# The tempo of trophic evolution in small-bodied primates

Running title: Trophic evolution in small-bodied primates

Jeremiah E. Scott  
Department of Medical Anatomical Sciences  
College of Osteopathic Medicine of the Pacific  
Western University of Health Sciences  
309 East Second Street  
Pomona, California 91766  
U.S.A.  
[jeremiah.e.scott@gmail.com](mailto:jeremiah.e.scott@gmail.com)

## Abstract

**Objectives:** As a primary trophic strategy, insectivory is uncommon and unevenly distributed across extant primates. This pattern is partly a function of the challenges that insectivory poses for large-bodied primates. In this study, I demonstrate that the uneven distribution is also a consequence of variation in the rate of trophic evolution among small-bodied lineages.

**Methods:** The sample consisted of 307 species classified by primary trophic strategy and body size, creating an ordered three-state character: small-insectivorous, small-herbivorous, and large-herbivorous. I tested for rate heterogeneity by partitioning major clades from the rest of the primate tree and estimating separate rates of transition between herbivory and insectivory for small-bodied lineages in each partition.

**Results:** Bayesian analysis of rate estimates indicates that a model with two rates of trophic evolution provides the best fit to the data. According to the model, lorisiforms have a trophic rate that is 4–6 times higher than the rate for other small-bodied lineages.

**Conclusions:** The rate heterogeneity detected here suggests that lorisiforms are characterized by traits that give them greater trophic flexibility than other primates. Previous discussions of trophic evolution in small-bodied primates focused on the low frequency of insectivory among anthropoids and the possibility that diurnality makes insectivory unlikely to evolve or persist. The present study challenges this idea by showing that a common transition rate can explain the distribution of insectivory in small-bodied anthropoids and nocturnal lemurs and tarsiers. The results of this study offer important clues for reconstructing trophic evolution in early primates.

**Keywords**            body size, diet, insectivory, herbivory, heterotachy

## 44 **1 | INTRODUCTION**

45 Primates exhibit an impressive diversity of trophic strategies. Among extant members of the  
46 order, frugivory is the most widespread primary strategy, but folivory is also common (Gómez &  
47 Verdú, 2012; Kay & Covert, 1984). The clade also includes specialized lineages such as the  
48 graminivorous gelada (*Theropithecus gelada*) of the Ethiopian Highlands, the tree-gouging,  
49 exudativorous marmosets (genera *Callithrix*, *Mico*, *Callibella*, and *Cebuella*) of Amazonia and  
50 the Atlantic Forest, and the exclusively faunivorous tarsiers (family Tarsiidae) of the Malay  
51 Archipelago (Fleagle, 2013). Explaining how this diversity arose—and particularly how it has  
52 been shaped by other aspects of primate biology—is a major goal of evolutionary primatology.

53       Body size has been recognized as an important influence on primate trophic evolution  
54 since Kay (1975) noted that folivores are mostly large-bodied whereas insectivores are mostly  
55 small. The correlation between body size and diet has been attributed to two other size-related  
56 trends (Kay, 1975; Kay & Covert, 1984; Kay & Hylander, 1978; Kay & Simons, 1980). First,  
57 because insects are small, dispersed, and often elusive, acquiring enough of them to meet  
58 metabolic requirements becomes more challenging as body size increases and is probably  
59 physiologically impossible above a certain threshold without specializing on social insects  
60 (McNab, 1984). Second, as body size decreases, digestive retention time becomes shorter and  
61 metabolic rate per unit mass increases, making it difficult for small-bodied primates to extract  
62 sufficient nutrition from leaves, which are resistant to chemical digestion and must be slowly  
63 fermented in the gut (Lambert, 1998). These arguments have also been invoked to explain why  
64 large-bodied frugivorous primates rely on leaves as their main source of dietary protein whereas  
65 small-bodied frugivores are dependent on insects (Kay & Simons, 1980; Kay & Covert, 1984).  
66 Size differentiation between herbivores and faunivores is pervasive across mammals (Price &

67 Hopkins, 2015; Grossnickle, 2020), indicating that the pattern found in primates is a general  
68 feature of mammalian biology.

69         The distribution of trophic strategies within small-bodied primates has generated  
70 additional hypotheses of constraint on the evolution of insectivory. Although insects are an  
71 important resource for many diurnal primates (e.g., Digby, Ferrari, & Saltzman, 2007; Kinzey,  
72 1992; Souza-Alves, Fontes, Chagas, & Ferrari, 2011; Zimble-DeLorenzo & Stone, 2011),  
73 insectivory as a primary trophic strategy (i.e., at least 50% a species' diet) is found mainly in  
74 nocturnal lineages (Figure 1). The reason for the rarity of insectivory in small-bodied diurnal  
75 lineages is unclear, but one hypothesis that has been proposed is that competition with diurnal  
76 birds has limited the ability of primates to become established in the diurnal arboreal insectivore  
77 niche (Cartmill, 1980; Charles-Dominique, 1975; Ross, 1996). This idea is difficult to test, but  
78 direct interactions between the two clades certainly do occur (Heymann & Hsia, 2015), and there  
79 is evidence that such interactions have had an influence on the distribution of species in each  
80 clade (Beaudrot et al., 2013a, 2013b).

81         A long history of adaptation to herbivory has also been identified as a possible constraint.  
82 In his discussion of primate origins, Rosenberger (2013) advocated for the idea that frugivory  
83 was the formative trophic influence on early primate evolution, responsible for many of the  
84 apomorphies that distinguish primates from other mammals (Sussman, 1991; Sussman,  
85 Rasmussen, & Raven, 2013; Szalay, 1968). As a consequence, he argued, a primarily  
86 insectivorous diet presents primates with “intense selective challenges” (Rosenberger, 2013, p.  
87 886), making it difficult for them to switch from herbivory to insectivory. Studies of acidic  
88 mammalian chitinase genes (*CHIAs*) provide support for the idea that some primate lineages  
89 have experienced changes to their digestive biology that may decrease the likelihood of

90 insectivory evolving or persisting (Emerling, Delsuc, & Nachman, 2018; Janiak, Chaney, &  
91 Tosi, 2018). However, in contrast to the global constraint proposed by Rosenberger, the  
92 distribution of *CHIA* pseudogenes and deletions among extant species indicates that gene  
93 functionality has been maintained by selection in some primate lineages and lost multiple times  
94 in others (Emerling et al., 2018; Janiak et al., 2018). As noted by the authors of the *CHIA* studies,  
95 this pattern of evolution is consistent with the hypothesis that insectivory was important for early  
96 primates (Cartmill, 1974, 1992, 2012), with various clades becoming more specialized for  
97 herbivory over time, perhaps resulting in variation across the primate tree in the ability to exploit  
98 insects as a primary dietary resource.

99         If these constraints, or others, are operating in primates, then they should manifest at the  
100 macroevolutionary level as heterogeneity among lineages in the rate of trophic evolution. For  
101 example, the hypothesis that diurnality limits the evolution of insectivory predicts that small-  
102 bodied anthropoids, which are mostly diurnal, will have a lower rate of transition between  
103 trophic states than other small-bodied primate lineages, which are mostly nocturnal.  
104 Evolutionary rates have been used to test hypotheses of constraint or to make a posteriori  
105 inferences of constraint in a diverse set of organismal traits, including flower size in plants  
106 (Barkman et al., 2008), forelimb morphology in marsupials (Cooper & Steppan, 2010), niche  
107 evolution in damselfishes (Litsios et al., 2012), growth form in angiosperms (Beaulieu, O'Meara,  
108 & Donoghue, 2013), and habitat shifts in diatoms (Nakov, Beaulieu, & Alverson, 2019). The  
109 goal of the present study is to evaluate the idea that trophic evolution is constrained in some  
110 small-bodied primate lineages by testing for variation in transition rates between insectivory and  
111 herbivory against the null hypothesis that a single rate can explain the distribution of insectivory  
112 and herbivory across the primate tree.

113

## 114 **2 | MATERIALS AND METHODS**

### 115 **2.1 | Tree and sample**

116 The analyses reported here were conducted using the phylogenetic topology estimated by  
117 Springer et al. (2012) for 367 extant primate taxa. This tree was pruned so that only species-level  
118 taxa recognized by Groves (2005) were included, resulting in a tree with 307 tips. Springer et al.  
119 provided four sets of divergence dates for the tree based on different assumptions about variation  
120 in rates of molecular evolution among lineages and the certainty of fossil calibrations. Two of the  
121 timetrees were used for the present study: one that assumed autocorrelated rates of molecular  
122 evolution with soft-bounded constraints on fossil calibrations, and one that assumed  
123 autocorrelated rates but with hard-bounded constraints. These two trees were preferred over the  
124 two that assumed independent rates of molecular evolution because autocorrelated rates provide  
125 a much better fit to the primate molecular data and appear to be more biologically realistic (dos  
126 Reis et al., 2018). The trees are available in the Supporting Information (Text S1 and Text S2).

127 Species were classified as insectivorous or herbivorous using primary field reports or  
128 recent reviews that compiled information on dietary composition from such reports. A species  
129 was considered insectivorous when insects and other small fauna constituted at least 50% of its  
130 diet. For some species, dietary percentages were not available. In those cases, assignments were  
131 made using qualitative descriptions from experts as long as the characterizations were  
132 compatible with quantitative data for the species' closest living relatives. A total of 26 species  
133 were identified as insectivorous (Table 1). The remaining taxa were categorized as herbivorous,  
134 which subsumes frugivory, seed predation, folivory, exudativory, and graminivory (see Table S1  
135 in the Supporting Information for the full list of taxa and character coding).

136 Species were further divided into small-bodied and large-bodied using literature  
137 compilations of body mass (Smith and Jungers, 1997; Jones et al., 2009; Fleagle, 2013). Two  
138 sets of analyses were performed using different size thresholds to evaluate whether the value  
139 used to dichotomize body size affects interpretations: 800 g and 1 kg. All species were assigned  
140 to a size category based on female body mass, given that females are considered more sensitive  
141 to energetic constraints than males (e.g., Gordon, Johnson, & Louis, 2013). Taxa without data on  
142 body mass were assigned to a size category when their position relative to the threshold could be  
143 assumed with high confidence (e.g., all callitrichines are smaller than 800 g).

144 The size and diet classifications were combined to create a three-state character: small-  
145 insectivorous, small-herbivorous, and large-herbivorous. This character was treated as ordered,  
146 with direct transitions between small-insectivorous and large-herbivorous prohibited (i.e.,  
147 SI↔SH↔LH). This coding scheme allowed transitions between trophic states within small-  
148 bodied lineages to be isolated in the analysis without compromising phylogenetic sampling by  
149 excluding large-bodied lineages.

150

## 151 **2.2 | Models of trait evolution**

152 Transition rates between character states were estimated using the multistate speciation and  
153 extinction model (MuSSE) in the package diversitree (FitzJohn, 2012) for R (R Core Team,  
154 2019). The hypothesis of variation in rates of trophic evolution was tested using diversitree's  
155 make.musse.split function, which splits subclades (foreground clades) from the rest of the tree  
156 (paraphyletic background) and allows each partition to have separate rate classes. The locations  
157 of the splits are selected prior to analysis. Three foreground clades were used for this study:  
158 Anthropoidea, Lemuriformes, and Lorisiformes. Initially, models with one split—one foreground

159 clade and the background—were examined. Depending on the results of those analyses, the  
160 model set was expanded to include models with two foreground clades.

161 For each character state, MuSSE estimates up to three parameters: the transition rate out  
162 of the state ( $q$ ), the speciation rate for lineages in the state ( $\lambda$ ), and the extinction rate for lineages  
163 in the state ( $\mu$ ). Thus, a MuSSE model for an ordered three-state character and no splits will have  
164 as many as  $k = 10$  estimated parameters. Adding a single split will double that number to  $k = 20$ ,  
165 which is almost certainly too many for the size of the primate tree. To reduce the parameter set to  
166 a more appropriate size, the following constraints were imposed. First, speciation and extinction  
167 rates were not allowed to vary by character state or across partitions. Second, transition rates  
168 between insectivory and herbivory in small-bodied lineages were set equal to each other within  
169 partitions (i.e.,  $q_{IH} = q_{HI}$ , where  $q_{IH}$  is the rate from insectivory to herbivory, and  $q_{HI}$  is the rate  
170 from herbivory to insectivory). Previous analysis of this data set using an unpartitioned tree  
171 found that the symmetric-rates model for transitions between trophic states provides a better fit  
172 to the data than a model that allows rate asymmetry (i.e.,  $q_{IH} \neq q_{HI}$ ) (Scott, 2019). Preliminary  
173 model comparisons using Akaike's information criterion indicated that the symmetric-rates  
174 assumption is also justified within the partitions examined here. For transitions between size  
175 classes among herbivores, there is strong support for rate asymmetry, with the rate into the large-  
176 bodied state being several times higher than the rate into the small-bodied state across the  
177 primate tree (Scott, 2019). Thus, size transition rates were allowed to vary within partitions.  
178 These constraints resulted in two-partition models with  $k = 8$  parameters: one trophic transition  
179 rate for each partition, two size transition rates for each partition, and one speciation rate and one  
180 extinction rate for the entire tree. A three-partition model (two foreground clades and the  
181 paraphyletic background) has at least one more parameter ( $k = 9$ ) for the second foreground

182 clade's trophic transition rate and, depending on the results, two additional parameters for that  
183 clade's size transitions ( $k = 11$ ).

184

### 185 **2.3 | Bayesian analysis of rate estimates**

186       Uncertainty in the maximum-likelihood estimate for each transition rate was examined  
187 using a Bayesian approach to approximate each parameter's posterior distribution. This part of  
188 the analysis was conducted with Markov chain Monte Carlo (MCMC) using diversitree's mcmc  
189 function (FitzJohn, 2012). Markov chains were generated following the procedures outlined in  
190 Johnson, FitzJohn, Smith, Rausher, & Otto (2011) and FitzJohn (2012), including their use of an  
191 exponential prior distribution with a mean of twice the net diversification rate (i.e., speciation  
192 rate minus extinction rate) for the entire tree. The chains were run for 120,000 generations, with  
193 the first 20,000 being discarded as burn-in. The remaining generations were thinned by sampling  
194 every tenth generation, resulting in a final sample of 10,000 generations for further analysis. The  
195 R package coda (Plummer, Best, Cowles, & Vines, 2006) was used to examine MCMC  
196 diagnostics on the thinned chains. Effective sample sizes for transition rates were high ( $n > 8200$ ,  
197 typically  $n > 9000$ ), autocorrelation among generations for each parameter was low ( $r < 0.07$ ,  
198 typically  $r < 0.03$ ), and trace plots indicated convergence.

199       The posterior distributions for the parameter estimates were used to compute posterior  
200 probabilities for differences between transition rates. The posterior probability that  $q_i$  is greater  
201 than  $q_j$  is simply the proportion of MCMC samples for which that statement is true (Goldberg et  
202 al., 2010). Such comparisons were made across partitions (e.g., Anthropoidea versus the  
203 background) and within partitions in the case of size transitions (e.g., the rate of transition into  
204 the large-bodied state versus the rate into the small-bodied state in Anthropoidea). Because the



205 posterior distributions for Lorisiformes were strongly right-skewed, rates were log-transformed  
206 (base  $e$ ) for visual presentation, but all quantitative comparisons were made using the  
207 untransformed rates.

208

## 209 **3 | RESULTS**

### 210 **3.1 | Two-partition models**

211 With Anthroidea split from the rest of the tree, there is moderate support for two rates of  
212 transition between insectivory and herbivory in small-bodied lineages. Anthropoids have a lower  
213 rate than other primates (Figure 2A): the maximum-likelihood estimate for the background rate  
214 is approximately 5–7 times higher than the estimate for anthropoids (Table S2). The posterior  
215 probabilities for rate heterogeneity in this partitioning scheme range from  $PP = 0.906$  to  $0.959$ ,  
216 depending on the tree and size threshold (Table 2). Support is highest when using a size  
217 threshold of 1 kg and the tree with soft-bounded constraints on fossil calibrations.

218 There is strong support for asymmetry in size transition rates among anthropoids, where  
219 transitions from small to large occur at a much higher rate than transitions in the reverse  
220 direction ( $PP > 0.99$ ; Figure 2B). In other primates, there is no evidence for such rate asymmetry  
221 ( $PP < 0.70$ ; Figure 2C). This difference in the pattern of size evolution is driven by the very low  
222 transition rate out of the large-bodied state in anthropoids. This rate differs from the other size  
223 transition rates with high posterior probability ( $PP > 0.98$ ), whereas the other three rates cannot  
224 be statistically distinguished from each other ( $PP < 0.85$ ; compare Figure 2B and 2C).

225 Given the strong support for these contrasting patterns of size evolution, the remaining  
226 two-partition models were modified to allow anthropoids to have their own set of size transition  
227 rates while constraining the rest of the tree to have a second set of size transition rates, regardless

228 of how the tree was partitioned for the analysis of trophic transition rates. Thus, these models  
229 have two partitions for trophic transition rates and two partitions for size transition rates. The  
230 model that allowed Lorisiformes to have a distinct trophic rate produced the strongest support for  
231 trophic rate heterogeneity among the two-partition models (Figure 3). In this case, lorisiforms  
232 have a rate of trophic evolution that is approximately 4–6 times higher than the background rate  
233 with high posterior probability ( $PP > 0.98$ ; Table S3). The results from the model that allowed  
234 Lemuriformes to have a distinct trophic rate indicate no support for trophic rate heterogeneity  
235 ( $PP < 0.70$ ; Figure 4; Table S4).

236

### 237 **3.2 | Three-partition model**

238 The two-partition analyses suggest three possibilities: (1) that anthropoids have a lower trophic  
239 transition rate than other primates, (2) that lorisiforms have a higher rate than other primates, or  
240 (3) that the two-partition models do not adequately describe the degree of rate heterogeneity in  
241 primates. To distinguish among these alternatives, a three-partition model with anthropoids and  
242 lorisiforms both foregrounded was constructed. This model allowed each partition to have its  
243 own rate of trophic evolution, with size transition rates partitioned as above (i.e., anthropoids  
244 versus all other primates, including lorisiforms; Table S5). Analysis of this model indicates that  
245 the anthropoid trophic rate cannot be clearly distinguished from the background rate ( $PP < 0.90$ ),  
246 that there is moderate support for lorisiforms having a higher trophic rate than the background  
247 ( $0.90 < PP < 0.96$ ), and that anthropoids and lorisiforms are very unlikely to be characterized by  
248 a common trophic rate ( $PP > 0.98$ ) (Table 3; Figure 5). These results suggest that, of the models  
249 considered here, the two-partition model with Lorisiformes as the foreground clade provides the  
250 best description of primate trophic evolution.

251

## 252 **4 | DISCUSSION**

### 253 **4.1 | Activity pattern and trophic evolution**

254 The rate heterogeneity detected here supports the idea that trophic evolution has been more labile  
255 in some small-bodied primate lineages than in others. The rarity of primarily insectivorous  
256 anthropoids has focused attention on this clade and the possibility that some aspect of diurnal  
257 ecology is a constraint on trophic evolution in primates (Cartmill, 1980; Charles-Dominique,  
258 1975; Ross, 1996; Scott, 2019). The results of the present study challenge this idea by showing  
259 that a single rate of transition between insectivory and herbivory can explain the distribution of  
260 trophic strategies among small-bodied lineages of mostly diurnal anthropoids and nocturnal  
261 lemurs and tarsiers. Insectivorous anthropoids and lemurs are nested deeply among herbivorous  
262 lineages, indicating that insectivory is an evolutionarily recent phenomenon in these two clades  
263 (Figure 1). Thus, despite differences in activity pattern, extant anthropoids and lemurs appear to  
264 be characterized by similar trophic evolutionary histories where herbivory has predominated and  
265 shifts to insectivory have been infrequent.

266 What distinguishes anthropoids in this analysis is their pattern of size evolution. In  
267 contrast to other primates, which are characterized by symmetric rates of transition into and out  
268 of the large-bodied state, anthropoids exhibit high rate asymmetry favoring shifts into the large-  
269 bodied state. This result is not surprising in light of the well-known differences in the distribution  
270 of body size among primate clades (e.g., Charles-Dominique, 1975; Fleagle, 1978, 2013;  
271 Jungers, 1984). The prevalence of large body size (>1 kg) in anthropoids is thought to be one of  
272 the solutions to the problem of trophic competition with diurnal birds, allowing anthropoids to  
273 specialize on herbivorous resources that birds cannot typically access (e.g., leaves and

274 mechanically protected fruits; Charles-Dominique, 1975; Ross, 1996). The results of this study  
275 are consistent with this idea, but they do not constitute additional evidence beyond the  
276 observation that anthropoids tend to be larger than diurnal birds. Diurnality can be considered an  
277 indirect influence on the distribution of insectivory across the primate tree to the extent that it  
278 increases the likelihood that large body size will evolve and persist. This effect is magnified by  
279 the tendency of diurnal lineages to diversify and accumulate at a higher rate than nocturnal  
280 lineages (Magnuson-Ford & Otto, 2012; Santini, Rojas, & Donati, 2015; Scott, 2018, 2019).  
281 However, the results of this study suggest that activity pattern does not have an effect on the rate  
282 of transition between herbivory and insectivory among small-bodied primates.

283         Because the broad-scale phylogenetic approach adopted here does not address the  
284 possibility that lineage-specific factors have produced similar patterns of trophic evolution in  
285 diurnal anthropoids and nocturnal lemurs, these results should not be viewed as a decisive  
286 rejection of the idea that diurnality is a constraint on primate trophic evolution. Studies  
287 conducted at a much finer scale of resolution may reveal different processes operating in each  
288 clade and establish equifinality. However, given the current state of knowledge, the low  
289 frequency of insectivory among small-bodied diurnal anthropoids does not appear to be unusual  
290 and therefore in need of explanation. Instead, it is the lorises and galagos that stand out relative  
291 to other small-bodied primates in having a greater tendency to shift between trophic states.

292

#### 293 **4.2 | Commitment to herbivory as a constraint on the evolution of insectivory**

294         The pattern of rate heterogeneity found in primates is consistent with the idea that  
295 adaptive commitment to herbivory has reduced the likelihood that insectivory will evolve or  
296 persist in some lineages. There are two ways to interpret the pattern of rate heterogeneity in this

297 context. The first posits that the low rate of transition between trophic states found in most of the  
298 primate tree is plesiomorphic, meaning that trophic evolution has been conservative for much of  
299 the clade's history. This inference, combined with the prevalence of herbivory among extant  
300 lineages, aligns with the view that many of the apomorphies that unite primates originated as  
301 adaptations for acquiring angiosperm products, and that this aspect of the clade's evolutionary  
302 history has biased primates against adopting insectivory as a primary trophic strategy  
303 (Rosenberger, 2013; Sussman et al., 2013). It follows that the higher rate of trophic evolution  
304 found in loriforms represents a derived acceleration, suggesting that lineages in this group  
305 evolved traits that allowed them to shift between trophic states more easily than other primates in  
306 response to ecological conditions. The evolutionary importance of insects as a primary or  
307 secondary dietary resource among loriforms was emphasized by Rasmussen & Nekaris (1998),  
308 who argued that adaptive divergence between Lorisidae and Galagidae in aspects of locomotor  
309 behavior, sensory systems, and life history was driven, in part, by specialization on insects with  
310 different properties: cryptic or toxic prey in the case of lorids versus active and elusive prey in  
311 the case of galagids. Notably, the ability to exploit insects has not necessarily channeled  
312 loriform lineages toward obligate insectivory, as in tarsiers. The present-day expression of this  
313 evolutionary history is the gradient of trophic strategies exhibited by galagids and the presence of  
314 herbivorous and insectivorous lorid sister lineages found in both Africa and Asia (Nekaris and  
315 Bearder, 2007).

316 The second scenario posits that the transition rate found in loriforms is plesiomorphic  
317 and that other primate clades evolved slower rates in parallel as they became more committed to  
318 a particular trophic strategy: herbivory in Anthropoidea and Lemuriformes, and insectivory in  
319 tarsiers. This scenario is less parsimonious than the first, but there are two lines of evidence that

320 suggest convergent, herbivory-driven rate slowdowns in anthropoids and lemurs. First, as noted  
321 above, studies of chitinase genes indicate pervasive homoplasy in loss of function in these genes  
322 across primates (Emerling et al., 2018; Janiak et al., 2018). Emerling et al. (2018) inferred that  
323 the plesiomorphic number of *CHIAs* for placental mammals is five functional genes, and that  
324 tarsiers retain this condition, implying that the last common ancestors of Primates and Haplorhini  
325 also had five. The anthropoids and lemurs that have been characterized so far, including small-  
326 bodied species, have two or fewer functional *CHIAs*, and some large-bodied species in both  
327 clades have lost function in all five genes, indicating separate histories of increasing commitment  
328 to herbivory (Emerling et al., 2018; Janiak et al., 2018). This conclusion is further reinforced by  
329 the observation that the lorisiform *Otolemur garnettii* has three functional *CHIAs* (Emerling et  
330 al., 2018; Janiak et al., 2018).

331         The second line of evidence suggesting convergent rate slowdowns in Anthropeida and  
332 Lemuriformes is the history of body-size evolution in each clade's smallest-bodied lineages. The  
333 smallest anthropoids are the Callitrichinae, which have long been regarded as phyletic dwarfs  
334 (e.g., Ford, 1980; Leutenegger, 1980; Rosenberger, 1992), descended from a common ancestor  
335 shared with other platyrrhines that weighed approximately 1–2 kg (Ford & Davis, 1992;  
336 Montgomery & Mundy, 2013; Silvestro et al., 2019). The closely related and slightly larger  
337 squirrel monkeys (genus *Saimiri*) may also be dwarfed (Ford & Davis, 1992; Rosenberger, 1992;  
338 Silvestro et al., 2019). Recent studies of size evolution in lemurs have concluded that the  
339 smallest members of this clade—species of the family Cheirogaleidae—have experienced  
340 episodes of size reduction similar to those reconstructed for callitrichines (Masters, Génin,  
341 Silvestro, Lister, & DelPero, 2014; Montgomery & Mundy, 2013). If these inferences of phyletic  
342 dwarfism are correct, then the evolutionary histories of small-bodied anthropoids and lemurs

343 may include long periods of relaxed selection on traits involved in extracting nutrition from  
344 insects (e.g., chitinase genes) owing to the lesser importance of insects as a dietary resource at  
345 large body size.

346         That most small-bodied anthropoids and lemurs have apparently entered their current size  
347 range via phyletic dwarfism contrasts with the pattern evident in lorisiforms and tarsiers, where  
348 small size appears to have prevailed throughout their histories (Beard, 1998; Beard, Qi, Dawson,  
349 Wang, & Li, 1994; Jaeger et al., 2010; Rossie, Ni, & Beard, 2006; Steiper & Seiffert, 2012;  
350 Seiffert, Simons, & Attia, 2003; Seiffert, Simons, Ryan, & Attia, 2005). The observation that  
351 tarsiers and at least some lorisiforms retain more functional *CHIAs* than other primates also  
352 suggests long histories of small body size with selection to maintain some of the primitive  
353 digestive machinery assembled in early insectivorous mammals (Emerling et al., 2018; Janiak et  
354 al., 2018). *Otolemur garnettii* is the only lorisiform in which *CHIAs* have been investigated so  
355 far (Emerling et al., 2018; Janiak et al., 2018). It is unclear how typical this galagid is of other  
356 lorisiforms, but the fact that the number of functional genes retained by *O. garnettii* (three) is  
357 intermediate between tarsiers (five) and anthropoids and lemurs (two or fewer) is consistent with  
358 the idea that lorisiforms have experienced episodes of adaptation to herbivory without becoming  
359 too specialized, resulting in a clade that has been more flexible than crown anthropoids,  
360 lemuriforms, and tarsiers with regard to shifting between trophic strategies.

361         Thus, whereas the first scenario outlined above views a slow rate of trophic evolution and  
362 commitment to herbivory as evolutionarily ancient and tied to the origin of crown primates, the  
363 second scenario raises the possibility that trophic evolution in early crown primates was more  
364 labile—similar to lorisiforms—before herbivory came to predominate in the case of crown  
365 anthropoids and lemurs, and insectivory in the case of tarsiers. Such trophic flexibility is

366 compatible with a last common ancestor of crown primates that was either primarily herbivorous  
367 (Rosenberger, 2013; Sussman et al., 2013) or primarily insectivorous (Cartmill, 1974, 1992,  
368 2012), and it implies that the ancestor's feeding adaptations did not necessarily constrain or bias  
369 trophic evolution as the crown clade began to diversify in the late Paleocene and early Eocene.

370

### 371 **4.3 | Evidence for trophic lability in the primate fossil record**

372 The primate fossil record provides some evidence that early small-bodied primates had a  
373 greater tendency to shift between trophic states than would be inferred from the distribution of  
374 states among extant anthropoids, lemurs, and tarsiers of similar size. Most of the small-bodied  
375 primates known from the early and middle Eocene are omomyiforms (e.g., Covert, 1986;  
376 Fleagle, 1978, 2013; Gilbert, 2005; Gingerich, 1981). Studies that have examined functional  
377 aspects of molar form in this group indicate that it was characterized by a level of trophic  
378 diversity similar to that found in extant lorisiforms (Strait, 2001). The evolutionary history of this  
379 diversity is difficult to reconstruct with confidence, given uncertainties in the relationships  
380 among omomyiform lineages (e.g., Morse et al., 2019; Tornow, 2008; Williams, 1994). Mapping  
381 inferred diets onto the phylogenetic tree generated by Seiffert et al. (2018) indicates a minimum  
382 of 5–7 shifts between trophic states over the course of approximately 20 million years (Figure 6).  
383 By comparison, the minimum number of shifts required to explain the distribution of states  
384 among extant primates is 10 across 60 million years or more of evolution (Scott, 2019),  
385 suggesting a relatively high rate of trophic evolution in omomyiforms. This conclusion is also  
386 supported by evidence for trophic diversity within two of the earliest genera—*Teilhardina* and  
387 *Steinicus* (Figure 6; Ni et al., 2004; Strait, 2001; Williams & Covert, 1994).



388           The broader significance of trophic evolution in omomyiforms is unclear owing to a lack  
389 of consensus regarding their phylogenetic relationships to the crown clades. Omomyiforms have  
390 been interpreted as stem tarsiers, stem haplorhines, or stem primates (see reviews in Fleagle,  
391 2013; Martin, 1993; Miller, Gunnell, & Martin, 2005). Rosenberger (2013), adopting the first of  
392 these alternatives as a working hypothesis, argued that trophic diversity within omomyiforms  
393 reflects different stages in a shift from frugivory to the highly specialized form of insectivory  
394 found in extant tarsiers. According to this view, the implications of omomyiform trophic  
395 diversity are limited to the tarsier lineage, and the pattern of diversity mostly indicates a  
396 directional macroevolutionary trend of increasing insectivory and its attendant morphological  
397 adaptations. However, if omomyiforms are stem haplorhines (e.g., Kay, Ross, & Williams, 1997)  
398 or representatives of an early radiation of primates not uniquely related to any of the crown  
399 clades (e.g., Martin, 1993; Miller et al., 2005), then their pattern of trophic diversity can be  
400 plausibly interpreted as consistent with the hypothesis that trophic evolution in early primates  
401 was more labile in comparison to crown Anthroidea, Tarsiidae, and Lemuriformes.

402           Other groups of Eocene primates appear to have been less trophically diverse than  
403 omomyiforms and more specialized for herbivory. Adapiformes—the other major radiation of  
404 primates known from the early and middle Eocene—are mostly large-bodied and are thought to  
405 have filled the ecological niches that are now dominated by extant large-bodied anthropoids and  
406 lemurs (i.e., diurnal herbivores) (Covert, 1986; Fleagle, 1978, 2013; Gilbert, 2005).  
407 Nevertheless, there is some evidence for trophic diversity among early small-bodied members of  
408 this group (e.g., *Donrussellia*, *Asiadapis*, and *Marcgodinotius*; Bajpai et al., 2008; Gilbert,  
409 2005). A similar pattern may hold in anthropoids, especially if Eosimiidae are stem anthropoids  
410 (Beard, Qi, Dawson, Wang, & Li, 1994; Kay et al., 1997; Williams, Kay, & Kirk, 2010; but see

411 Miller et al., 2005). Small-bodied anthropoids from the late Eocene and early Oligocene have  
412 been reconstructed as primarily frugivorous (Kirk & Simons, 2001). In contrast, the molars of  
413 middle Eocene eosimiids exhibit morphologies suggesting that these species were more  
414 insectivorous than later anthropoids (cf. Heesy & Ross, 2004; Kirk & Simons, 2001) and perhaps  
415 comparable to *Saimiri*, the most insectivorous extant anthropoid (Zimble-DeLorenzo & Stone,  
416 2011; Table 1). Thus, although adapiforms and early anthropoids appear to have been largely  
417 herbivorous radiations, there are hints of greater trophic diversity in the earliest members of  
418 these clades, suggesting that trophic evolution may have been more labile before herbivory  
419 became the dominant trophic strategy.

420

## 421 5 | CONCLUSIONS

422 The results of this study indicate that the rate of trophic evolution in small-bodied  
423 primates varies among clades. Contrary to expectations, small-bodied anthropoids do not have an  
424 unusually low rate in comparison to other lineages. This finding challenges the hypothesis that  
425 there is a direct connection between diurnality and the low frequency of insectivorous  
426 anthropoids. The main contrast detected here involves lorisiforms, which have a much greater  
427 tendency to shift between insectivory and herbivory than other primates. The implications of this  
428 pattern of rate heterogeneity are unclear. The most parsimonious interpretation is that the  
429 lorisiform rate is apomorphic, implying that primate trophic evolution has been conservative  
430 throughout much of the clade's history. However, various lines of evidence suggest the  
431 possibility of convergent rate slowdowns in anthropoids, lemuriforms, and tarsiers owing to  
432 greater specialization for herbivory in the case of anthropoids and lemurs, and insectivory in the  
433 case of tarsiers. These two scenarios can be tested as sampling of the earliest part of the primate

434 fossil record increases, and as our understanding of the Eocene primate phylogeny and trophic  
435 adaptations improves.

436

437 **ACKNOWLEDGMENTS**

438 I thank Tierra Nalley and Kristi Lewton for helpful comments on an earlier version of this  
439 manuscript.

440

441 **DATA AVAILABILITY STATEMENT**

442 The data used for this study are available in Table S1 in the Supporting Information.

443

444

445 **REFERENCES**

- 446 Bajpai, S., Kay, R. F., Williams, B. A., Das, D. P., Kapur, V. V., & Tiwari, B. N. (2008). The  
447 oldest Asian record of Anthrogoidea. *Proceedings of the National Academy of Sciences*  
448 *of the United States of America*, *105*, 11093–11098.
- 449 Beard, K. C., Qi, T., Dawson, M. R., Wang, B., & Li, C. (1994). A diverse new primate fauna  
450 from middle Eocene fissure-fillings in southeastern China. *Nature*, *368*, 604–609
- 451 Barkman, T. J., Bendiksbj, M., Lim, S.-H., Salleh, K. M., Nais, J., Madulid, D., & Schumacher,  
452 T. (2008). Accelerated rates of floral evolution at the upper size limit for flowers. *Current*  
453 *Biology*, *18*, 1508–1513.
- 454 Beard, K. C. (1998). A new genus of Tarsiidae (Mammalia: Primates) from the middle Eocene of  
455 Shanxi Province, China, with notes on the historical biogeography of tarsiers. *Bulletin of*  
456 *Carnegie Museum of Natural History*, *34*, 260–277.
- 457 Beard, K. C., Qi, T., Dawson, M. R., Wang, B., & Li, C. (1994). A diverse new primate fauna  
458 from middle Eocene fissure-fillings in southeastern China. *Nature*, *368*, 604–609.
- 459 Beaudrot, L., Struebig, M. J., Meijaard, E., van Balen, S., Husson, S., & Marshall, A. J. (2013a).  
460 Co-occurrence patterns of Bornean vertebrates suggest competitive exclusion is strongest  
461 among distantly related species. *Oecologia*, *173*, 1053–1062.
- 462 Beaudrot, L., Struebig, M. J., Meijaard, E., van Balen, S., Husson, S., Young, C. F., & Marshall,  
463 A. J. (2013b). Interspecific interactions between primates, birds, bats, and squirrels may  
464 affect community composition on Borneo. *American Journal of Primatology*, *75*, 170–  
465 185.

- 466 Beaulieu, J. M., O'Meara, B. C., & Donoghue, M. J. (2013). Identifying hidden rate changes in  
467 the evolution of a binary morphological character: the evolution of plant habit in  
468 campanulid angiosperms. *Systematic Biology*, *62*, 725–737.
- 469 Biebouw, K. (2013). Preliminary results on the behavioral ecology of the hairy-eared dwarf  
470 lemur (*Allocebus trochotis*) in Andasibe, eastern Madagascar. In J. Masters, M. Gamba,  
471 & F. Génin (Eds.), *Leaping ahead: advances in prosimian biology* (pp. 113–120). New  
472 York, NY: Springer.
- 473 Burrows, A. M., & Nash, L. T. (2010). Searching for dental signals of exudativory in galagos. In  
474 A. M. Burrows & L. T. Nash (Eds.), *The evolution of exudativory in primates* (pp. 211–  
475 233). New York, NY: Springer.
- 476 Butynski, T. M., & de Jong, Y. A. (2004). Natural history of the Somali lesser galago (*Galago*  
477 *gallarum*). *Journal of East African Natural History*, *93*, 23–38.
- 478 Cartmill, M. (1974). Rethinking primate origins. *Science*, *184*, 436–443.
- 479 Cartmill, M. (1980). Morphology, function, and evolution of the anthropoid postorbital septum.  
480 In R. L. Chiochon & A. B. Chiarelli (Eds.), *Evolution biology of the New World monkeys*  
481 *and continental drift* (pp. 243–274). New York, NY: Plenum Press.
- 482 Cartmill, M. (1992). New views on primate origins. *Evolutionary Anthropology*, *1*, 105–111.
- 483 Cartmill, M. (2012). Primate origins, human origins, and the end of higher taxa. *Evolutionary*  
484 *Anthropology*, *21*, 208–220.
- 485 Charles-Dominique, P. (1975). Nocturnality and diurnality: an ecological interpretation of these  
486 two modes of life by an analysis of the higher vertebrate fauna in tropic forest  
487 ecosystems. In W. P. Luckett & F. S. Szalay (Eds.), *Phylogeny of the primates: a*  
488 *multidisciplinary approach* (pp. 69–88). New York, NY: Plenum Press.

- 489 Cooper, W. J., & Stepan, S. J. (2010). Developmental constraint on the evolution of marsupial  
490 forelimb morphology. *Australian Journal of Zoology*, *58*, 1–15.
- 491 Covert, H. H. (1986). Biology of early Cenozoic primates. In D. R. Swindler & J. Erwin (Eds.),  
492 *Comparative primate biology: Vol. 1. Systematics, evolution, and anatomy* (pp. 335–  
493 359). New York: Alan R. Liss.
- 494 Digby, L. J., Ferrari, S. F., & Saltzman, W. (2007). Callitrichines: the role of competition in  
495 cooperatively breeding species. In C. J. Campbell, A. Fuentes, K. C. MacKinnon, M.  
496 Panger, & S. K. Bearder (Eds.), *Primates in perspective* (pp. 85–105). Oxford: Oxford  
497 University Press.
- 498 dos Reis, M., Gunnell, G. F., Barba-Montoya, J., Wilkins, A., Yang, Z., & Yoder, A.D. (2018).  
499 Using phylogenomic data to explore the effects of relaxed clocks and calibration  
500 strategies on divergence time estimation: primates as a test case. *Systematic Biology*, *67*,  
501 594–615.
- 502 Emerling, C. A., Delsuc, F., & Nachman, M. W. (2018). Chitinase genes (*CHIAs*) provide  
503 genomic footprints of a post-Cretaceous dietary radiation in placental mammals. *Science*  
504 *Advances*, *4*: eaar6478. DOI: 10.1126/sciadv.aar6478.
- 505 FitzJohn, R. G. (2012). Diversitree: comparative phylogenetic analyses of diversification in R.  
506 *Methods in Ecology and Evolution*, *3*, 1084–1092.
- 507 Fleagle, J. G., (1978). Size distributions of living and fossil primate faunas. *Paleobiology*, *4*, 67–  
508 76.
- 509 Fleagle, J. G. (2013). *Primate adaptation & evolution* (3rd ed.). San Diego, CA: Academic Press.
- 510 Ford, S. M. (1980). Callitrichids as phyletic dwarfs, and the place of the Callitrichidae in  
511 Platyrrhini. *Primates*, *21*, 31–43.

- 512 Ford, S. M., & Davis, L. C. (1992). Systematics and body size: implications for feeding  
513 adaptations in New World monkeys. *American Journal of Physical Anthropology*, 88,  
514 415–468.
- 515 Génin, F., Yokwana, A., Kom, N., Couette, S., Dieuleveut, T., Nash, S. D., & Masters, J. C.  
516 (2016). A new galago species for South Africa (Primates: Strepsirhini: Galagidae).  
517 *African Zoology*, 51, 135–143.
- 518 Gilbert, C. C. (2005). Dietary ecospace and the diversity of euprimates during the early and  
519 middle Eocene. *American Journal of Physical Anthropology*, 126, 237–249.
- 520 Gingerich, P. D. (1981). Early Cenozoic Omomyidae and the evolutionary history of tarsiiiform  
521 primates. *Journal of Human Evolution*, 10, 345–374.
- 522 Goldberg, E. E., Kohn, J. R., Lande, R., Robertson, K. A., Smith, S. A., Igić, B. (2010). Species  
523 selection maintains self-incompatibility. *Science*, 330, 493–495.
- 524 Gómez, J. M., & Verdú, M. (2012). Mutualism with plants drives primate diversification.  
525 *Systematic Biology*, 61, 567–577.
- 526 Gordon, A. D., Johnson, S. E., & Louis, E. E., Jr. (2013). Females are the ecological sex: sex-  
527 specific body mass ecogeography in wild sifaka populations (*Propithecus* spp.).  
528 *American Journal of Physical Anthropology*, 151, 77–87.
- 529 Grossnickle, D. M. (2020). Feeding ecology has a stronger evolutionary influence on functional  
530 morphology than on body mass in mammals. *Evolution*, 74, 610–628.
- 531 Groves, C. P. (2005). Order Primates. In D. E. Wilson & D. M. Reeder (Eds.), *Mammal species*  
532 *of the world: a taxonomic and geographic reference* (3rd ed., pp. 111–184). Baltimore,  
533 MD: Johns Hopkins University Press.

- 534 Harcourt, C. S., & Nash, L. T. (1986). Species differences in substrate use and diet between  
535 sympatric galagos in two Kenyan coastal forests. *Primates*, 27, 41–52.
- 536 Heesy, C. P., & Ross, C. F. (2004). Mosaic evolution of activity pattern, diet, and color vision in  
537 haplorhine primates. In C. F. Ross & R. F. Kay (Eds.), *Anthropoid origins: new visions*  
538 (pp. 665–698). New York, NY: Kluwer Academic/Plenum Press.
- 539 Heymann, E. W., & Hsia, S. S. (2015). Unlike fellows—a review of primate–non-primate  
540 associations. *Biological Reviews*, 90, 142–156.
- 541 Hladik, C. M., Charles-Dominique, P., & Petter, J. J. (1980). Feeding strategies of five nocturnal  
542 prosimians in the dry forest of the west coast of Madagascar. In P. Charles-Dominique,  
543 H. M. Cooper, A. Hladik, C. M. Hladik, E. Pages, G. F. Pariente, A. Petter-Rousseaux, J.  
544 J. Petter, & A. Schilling (Eds.), *Nocturnal Malagasy primates: ecology, physiology, and*  
545 *behavior* (pp. 41–73). New York, NY: Academic Press.
- 546 Jaeger, J.-J., Beard, K. C., Chaimanee, Y., Salem, M., Benammi, M., Hlal, O., ... Brunet, M.  
547 (2010). Late middle Eocene epoch of Libya yields earliest known radiation of African  
548 anthropoids. *Nature*, 467, 1095–1098).
- 549 Janiak, M. C., Chaney, M. E., & Tosi, A. J. (2018). Evolution of acidic mammalian chitinase  
550 genes (*CHIA*) is related to body mass and insectivory in primates. *Molecular Biology &*  
551 *Evolution*, 35, 607–622.
- 552 Johnson, M. T. J., FitzJohn, R. G., Smith, S. D., Rausher, M. D., & Otto, S. P. (2011). Loss of  
553 sexual recombination and segregation is associated with increased diversification in  
554 evening primroses. *Evolution*, 65, 3230–3240.



- 555 Jones, K. E., Bielby, J., Cadillo, M., Fritz, S. A., O'Dell, J., Orme, C. D. L., ... Purvis, A. (2009).  
556 PanTHERIA: a species-level database of life history, ecology, and geography of extant  
557 and recently extinct mammals. *Ecology*, *90*, 2648.
- 558 Jungers, W. L. (1984). Aspects of size and scaling in primate biology with special reference to  
559 the locomotor skeleton. *Yearbook of Physical Anthropology*, *27*, 73–97.
- 560 Kay, R. F. (1975). The functional adaptations of primate molar teeth. *American Journal of*  
561 *Physical Anthropology*, *43*, 195–216.
- 562 Kay, R. F., & Covert, H. H. (1984). Anatomy and behavior of extinct primates. In D. J. Chivers,  
563 B. A. Wood, & A. Bilsborough (Eds.), *Food acquisition and processing in primates* (pp.  
564 467–508. New York, NY: Plenum Press.
- 565 Kay, R. F., & Hylander, W. L. (1978). The dental structure of mammalian folivores with special  
566 reference to Primates and Phalangerioidea. In G. G. Montgomery (Ed.), *The ecology of*  
567 *arboreal folivores* (pp. 173–191). Washington, DC: Smithsonian Institution Press.
- 568 Kay, R. F., Ross, C., & Williams, B. A. (1997). Anthropoid origins. *Science*, *275*, 797–804.
- 569 Kay, R. F., & Simons, E. L. (1980). The ecology of Oligocene African Anthroidea.  
570 *International Journal of Primatology*, *1*, 21–37.
- 571 Kinzey, W. G. (1992). Dietary and dental adaptations in the Pitheciinae. *American Journal of*  
572 *Physical Anthropology*, *88*, 499–514.
- 573 Kirk, E. C., & Simons, E. L. (2001). Diets of fossil primates from the Fayum Depression of  
574 Egypt: a quantitative analysis of molar shearing. *Journal of Human Evolution*, *40*, 203–  
575 229.
- 576 Lambert, J. E. (1998). Primate digestion: interactions among anatomy, physiology, and feeding  
577 ecology. *Evolutionary Anthropology*, *7*, 8–20.

- 578 Leutenegger, W. (1980). Monogamy in callitrichids: a consequence of phyletic dwarfism?  
579 *International Journal of Primatology*, 1, 95–98.
- 580 Litsios, G., Pellissier, L., Forest, F., Lexer, C., Pearman, P. B., Zimmerman, N. E., & Salamin,  
581 N. (2012). Trophic specialization influences the rate of environmental niche evolution in  
582 damselfishes (Pomacentridae). *Proceedings of the Royal Society B*, 279, 3662–3669.
- 583 Maddison, W. P., & Maddison, D. R. (2019). Mesquite: a modular system for evolutionary  
584 analysis (version 3.61). Available from <http://www.mesquiteproject.org>.
- 585 Magnuson-Ford, K., & Otto, S. P. (2012). Linking the investigations of character evolution and  
586 species diversification. *American Naturalist*, 180, 225–245.
- 587 Martin, R. D. (1993). Primate origins: plugging the gaps. *Nature*, 363, 223–234.
- 588 Masters, J. C., Génin, F., Silvestro, D., Lister, A. M., & DelPero, M. (2014). The red island and  
589 the seven dwarfs: body size reduction in Cheirogaleidae. *Journal of Biogeography*, 41,  
590 1833–1847.
- 591 McNab, B. K. (1984). Physiological convergence amongst ant-eating and termite-eating  
592 mammals. *Journal of Zoology, London*, 203, 485–510.
- 593 Miller, E. R., Gunnell, G. F., & Martin, R. D. (2005). Deep time and the search for anthropoid  
594 origins. *Yearbook of Physical Anthropology*, 48, 60–95.
- 595 Montgomery, S. H., & Mundy, N. I. (2013). Parallel episodes of phyletic dwarfism in callitrichid  
596 and cheirogaleid primates. *Journal of Evolutionary Biology*, 26, 810–819.
- 597 Morse, P. E., Chester, S. G. B., Boyer, D. M., Smith, T., Smith, R., Gigase, P., & Bloch, J. I.  
598 (2019). New fossils, systematics, and biogeography of the oldest known crown primate  
599 *Teilhardina* from the earliest Eocene of Asia, Europe, and North America. *Journal of*  
600 *Human Evolution*, 128, 103–131.

- 601 Nakov, T., Beaulieu, J. M., & Alverson, A. J. (2019). Diatoms diversify and turn over faster in  
602 freshwater than marine environments. *Evolution*, 73, 2497–2511.
- 603 Nash, L. T., Bearder, S. K., & Olson, T.R. (1989). Synopsis of *Galago* species characteristics.  
604 *International Journal of Primatology*, 10, 57–80.
- 605 Nekaris, K. A. I., & Bearder, S. K. (2007). The lorisiform primates of Asia and mainland Africa.  
606 In C. J. Campbell, A. Fuentes, K. C. MacKinnon, M. Panger, & S. K. Bearder (Eds.),  
607 *Primates in perspective* (pp. 24–45). Oxford: Oxford University Press.
- 608 Ni, X., Wang, Y., Hu, Y., & Li, C. (2004). A euprimate skull from the early Eocene of China.  
609 *Nature*, 427, 65–68.
- 610 Niemitz, C. (1984). Synecological relationships and feeding behaviour of the genus *Tarsius*. In  
611 C. Niemitz (Ed.), *Biology of tarsiers* (pp. 59–75). Stuttgart: Gustav Fischer Verlag.
- 612 Plummer, M., Best, N., Cowles, K., & Vines, K. (2006). CODA: convergence diagnosis and  
613 output analysis for MCMC. *R News*, 6, 7–11.
- 614 Price, S. A., & Hopkins, S. S. B. (2015). The macroevolutionary relationship between diet and  
615 body mass across mammals. *Biological Journal of the Linnean Society*, 115, 173–184.
- 616 Rasmussen, D. T., & Nekaris, K. A. (1998). Evolutionary history of lorisiform primates. *Folia*  
617 *Primatologica*, 69(Suppl. 1), 250–285.
- 618 R Core Team (2019). R: a language and environment for statistical computing. Vienna, Austria:  
619 R Foundation for Statistical Computing. <https://www.R-project.org/>.
- 620 Rosenberger, A. L. (1992). Evolution of feeding niches in New World monkeys. *American*  
621 *Journal of Physical Anthropology*, 88, 525–562.
- 622 Rosenberger, A. L. (2013). Fallback foods, preferred foods, adaptive zones, and primate origins.  
623 *American Journal of Primatology*, 75, 883–890.

- 624 Ross, C. (1996). Adaptive explanation for the origins of the Anthroidea (Primates). *American*  
625 *Journal of Primatology*, *40*, 205–230.
- 626 Rossie, J. B., Ni, X., Beard, K. C. (2006). Cranial remains of an Eocene tarsier. *Proceedings of*  
627 *the National Academy of Sciences of the United States of America*, *103*, 4381–4385.
- 628 Rovero, F., Marshall, A. R., Jones, T., & Perkin, A. (2009). The primates of Udzungwa  
629 Mountains: diversity, ecology and conservation. *Journal of Anthropological Sciences*, *87*,  
630 93–126.
- 631 Santini, L., Rojas, D., & Donati, G. (2015). Evolving through day and night: origin and  
632 diversification of activity pattern in modern primates. *Behavioral Ecology*, *26*, 789–796.
- 633 Scott, J. E. (2018). Reevaluating cases of trait-dependent diversification in primates. *American*  
634 *Journal of Physical Anthropology*, *167*, 244–256.
- 635 Scott, J. E. (2019). Macroevolutionary effects on primate trophic evolution and their implications  
636 for reconstructing primate origins. *Journal of Human Evolution*, *133*, 1–12.
- 637 Seiffert, E. R., Simons, E. L., & Attia, Y. (2003). Fossil evidence for ancient divergence of  
638 lorises and galagos. *Nature*, *422*, 421–424.
- 639 Seiffert, E. R., Boyer, D. M., Fleagle, J. G., Gunnell, G. F., Heesy, C. P., Perry, J. M. G., &  
640 Sallam, H. M. (2018). New adapiform primate fossil from the late Eocene of Egypt.  
641 *Historical Biology*, *30*, 204–226.
- 642 Seiffert, E. R., Simons, E. L., Ryan, T. M., & Attia, Y. (2005). Additional remains of *Wadilemur*  
643 *elegans*, a primitive stem galagid from the late Eocene of Egypt. *Proceedings of the*  
644 *National Academy of Sciences of the United States of America*, *102*, 11396–11401.

- 645 Silvestro, D., Tejedor, M. F., Serrano-Serrano, M. L., Loiseau, O., Rossier, V., Rolland, J., ...  
646 Salamin, N. (2019). Early arrival and climatically-linked geographic expansion of New  
647 World monkeys from tiny African ancestors. *Systematic Biology*, 68, 78–92.
- 648 Smith, R. J., & Jungers, W. L. (1997). Body mass in comparative primatology. *Journal of*  
649 *Human Evolution*, 32, 523–559.
- 650 Souza-Alves, J. P., Fontes, I. P., Chagas, R. R. D., & Ferrari, S. F. (2011). Seasonal versatility in  
651 the feeding ecology of a group of titis (*Callicebus coimbrai*) in the northern Brazilian  
652 Atlantic Forest. *American Journal of Primatology*, 73, 1199–1209.
- 653 Springer, M. S., Meredith, R. W., Gatesy, J., Emerling, C. A., Park, J., Rabosky, D. L., ...  
654 Murphy, W. J. (2012). Macroevolutionary dynamics and historical biogeography of  
655 primate diversification inferred from a species supermatrix. *PLoS ONE*, 7, e49521. DOI:  
656 10.1371/journal.pone.0049521.
- 657 Steiper, M. E., & Seiffert, E. R. (2012). Evidence for a convergent slowdown in primate  
658 molecular rates and its implications for the timing of early primate evolution.  
659 *Proceedings of the National Academy of Sciences of the United States of America*, 109,  
660 6006–6011.
- 661 Strait, S. G. (2001). Dietary reconstruction of small-bodied omomyoid primates. *Journal of*  
662 *Vertebrate Paleontology*, 21, 322–334.
- 663 Sussman, R. W. (1991). Primate origins and the evolution of angiosperms. *American Journal of*  
664 *Primatology*, 23, 209–223.
- 665 Sussman, R. W., Rasmussen, D. T., & Raven, P. H. (2013). Rethinking primate origins again.  
666 *American Journal of Primatology*, 75, 95–106.
- 667 Szalay, F. S. (1968). The beginnings of primates. *Evolution*, 22, 19–36.

- 668 Tornow, M. A. (2008). Systematic analysis of the Eocene primate Omomyidae using gnathic and  
669 postcranial data. *Bulletin of the Peabody Museum of Natural History*, 49, 43–129.
- 670 Williams, B. A. (1994). *Phylogeny of the Omomyidae and implications for anthropoid origins*  
671 (Unpublished doctoral dissertation). University of Colorado, Boulder.
- 672 Williams, B. A., & Covert, H. H. (1994). New early Eocene anaptomorphine primate  
673 (Omomyidae) from the Washakie Basin, Wyoming, with comments on the phylogeny  
674 and paleobiology of anaptomorphines. *American Journal of Physical Anthropology*, 93,  
675 323–340.
- 676 Williams, B. A., Kay, R. F., & Kirk, E. C. (2010). New perspectives on anthropoid origins.  
677 *Proceedings of the National Academy of Sciences of the United States of America*, 107,  
678 4797–4804.
- 679 Zimble-DeLorenzo, H. S., & Stone, A. I. (2011). Integration of field and captive studies for  
680 understanding the behavioral ecology of the squirrel monkey (*Saimiri* sp.). *American*  
681 *Journal of Primatology*, 73, 607–622.
- 682
- 683

684 **FIGURE CAPTIONS**

685 **FIGURE 1.** Primate phylogenetic tree from Springer et al. (2012) showing the distribution of  
686 trophic states by activity pattern among small-bodied species (<1 kg) at the tips (Scott, 2019).  
687 Cathemeral species are grouped with diurnal species. Large-bodied species, which are uniformly  
688 herbivorous and mostly diurnal, are not labeled. The relative frequency of insectivorous species  
689 is much greater among nocturnal lineages (41.5%) than among diurnal lineages (9.5%).

690

691 **FIGURE 2.** Posterior distributions of trophic transition rates (A) and size transition rates (B, C)  
692 for the model with Anthroidea split from the rest of the tree and a size threshold of 800 g. The  
693 results shown here were generated using the timetree that assumed autocorrelated rates and soft-  
694 bounded constraints. Anth = Anthroidea, Tars = Tarsiiformes, Lem = Lemuriformes, Lor =  
695 Lorisiformes,  $q$  = transition rate, SL = small to large, LS = large to small.

696

697 **FIGURE 3.** Posterior distributions of trophic transition rates for the model with Lorisiformes  
698 split from the rest of the tree and a size threshold of 800 g. The results shown here were  
699 generated using the timetree that assumed autocorrelated rates and soft-bounded constraints.

700 Anth = Anthroidea, Tars = Tarsiiformes, Lem = Lemuriformes, Lor = Lorisiformes,  $q$  =  
701 transition rate.

702

703 **FIGURE 4.** Posterior distributions of trophic transition rates for the model with Lemuriformes  
704 split from the rest of the tree and a size threshold of 800 g. The results shown here were  
705 generated using the timetree that assumed autocorrelated rates and soft-bounded constraints.

706 Anth = Anthroidea, Tars = Tarsiiformes, Lem = Lemuriformes, Lor = Lorisiformes,  $q$  =  
707 transition rate.

708

709 **FIGURE 5.** Posterior distributions of trophic transition rates for the model with Anthroidea  
710 and Lorisiformes each split from the rest of the tree and a size threshold of 800 g. The results  
711 shown here were generated using the timetree that assumed autocorrelated rates and soft-  
712 bounded constraints. Anth = Anthroidea, Tars = Tarsiiformes, Lem = Lemuriformes, Lor =  
713 Lorisiformes,  $q$  = transition rate.

714

715 **FIGURE 6.** Phylogenetic distribution of trophic strategies among early and middle Eocene  
716 omomyiform genera. Dietary reconstructions for each genus are based mainly on the work of  
717 Strait (2001), with additional information from Ni, Wang, Hu, & Li (2004) and Williams &  
718 Covert (1994). Parsimony reconstructions of diet, obtained using Mesquite (v. 3.61; Maddison &  
719 Maddison, 2019), indicate a minimum of 5–7 shifts between trophic states, depending on how  
720 ambiguous taxa are coded. The reconstructions shown here are based on the data set where  
721 *Bownomomys* and *Dyseolemur* were coded as ambiguous (see Strait, 2001). The tree was taken  
722 from the Bayesian tip-dating phylogenetic analysis conducted by Seiffert et al. (2018; see their  
723 figure 17). Branch lengths are proportional to time; the tree spans approximately 20 million years  
724 from root to most recent tip (*Necrolemur*). *Teilhardina* includes *T. asiatica* and *T. belgica*;  
725 *Steinius* includes *S. vespertinus* and *S. annectens*; the use of *Bownomomys* here follows Morse et  
726 al. (2019) and is equivalent to *Teilhardina americana* in previous studies. See Strait (2001) and  
727 Seiffert et al. (2018) for the complete lists of species-level taxa.

728



**TABLE 1** Primates classified as insectivorous for this study

| Species                        | % Faunivory                 | Source                                    |
|--------------------------------|-----------------------------|-------------------------------------------|
| <i>Galagoides thomasi</i>      | 70                          | Nekaris & Bearder, 2007                   |
| <i>Galagoides demidoff</i>     | 70                          | Nekaris & Bearder, 2007                   |
| <i>Galago matschiei</i>        | qualitative <sup>†</sup>    | Nash, Bearder, & Olson, 1989              |
| <i>Galago moholi</i>           | 52                          | Nekaris & Bearder, 2007                   |
| <i>Galago gallarum</i>         | qualitative <sup>†</sup>    | Butynski & de Jong, 2004                  |
| <i>Galago senegalensis</i>     | 50                          | Burrows & Nash, 2010                      |
| <i>Paragalago orinus</i>       | qualitative <sup>†</sup>    | Rovero, Marshall, Jones, & Perkin, 2009   |
| <i>Paragalago granti</i>       | qualitative <sup>†</sup>    | Génin et al., 2016                        |
| <i>Paragalago zanzibaricus</i> | 70                          | Harcourt & Nash, 1986                     |
| <i>Otolemur garnettii</i>      | 50                          | Harcourt & Nash, 1986                     |
| <i>Loris lydekkerianus</i>     | 96                          | Nekaris & Bearder, 2007                   |
| <i>Loris tardigradus</i>       | 100                         | Nekaris & Bearder, 2007                   |
| <i>Arctocebus calabarensis</i> | 85                          | Rothman et al., 2014                      |
| <i>Arctocebus aureus</i>       | 85                          | Rothman et al., 2014                      |
| <i>Allocebus trichotis</i>     | 70                          | Biebouw, 2013                             |
| <i>Mirza coquereli</i>         | >50                         | Hladik, Charles-Dominique, & Petter, 1980 |
| <i>Microcebus rufus</i>        | 54                          | Rothman et al., 2014                      |
| <i>Tarsius dentatus</i>        | 100                         | Niemitz, 1984                             |
| <i>Tarsius tarsier</i>         | 100                         | Niemitz, 1984                             |
| <i>Tarsius sangirensis</i>     | 100                         | Niemitz, 1984                             |
| <i>Cephalopachus bancanus</i>  | 100                         | Niemitz, 1984                             |
| <i>Carlito syrichta</i>        | 100                         | Niemitz, 1984                             |
| <i>Saimiri sciureus</i>        | 79–97                       | Zimble-DeLorenzo & Stone, 2011            |
| <i>Saimiri oerstedii</i>       | 90                          | Zimble-DeLorenzo & Stone, 2011            |
| <i>Saimiri boliviensis</i>     | 75                          | Zimble-DeLorenzo & Stone, 2011            |
| <i>Saimiri ustus</i>           | as for other <i>Saimiri</i> | Zimble-DeLorenzo & Stone, 2011            |

<sup>†</sup> For some species, dietary percentages were not available. In such cases, I used qualitative accounts from experts as long as the description was consistent with quantitative data for the species' closest living relatives. See Table S1 in the Supporting Information for the full sample.

**TABLE 2** Support for trophic-rate differences in two-partition models

| Model comparison          | Posterior probability |        |               |        |
|---------------------------|-----------------------|--------|---------------|--------|
|                           | AUTOsoft tree         |        | AUTOhard tree |        |
|                           | t.800                 | t.1000 | t.800         | t.1000 |
| Anthropoidea < background | 0.917                 | 0.959  | 0.906         | 0.946  |
| Lorisiformes > background | 0.985                 | 0.992  | 0.983         | 0.989  |
| Lemuriformes > background | 0.622                 | 0.676  | 0.614         | 0.647  |

Notation: AUTOsoft = autocorrelated rates of molecular evolution and soft-bounded constraints; AUTOhard = autocorrelated rates of molecular evolution and hard-bounded constraints; t.800 = size threshold of 800 g; t.1000 = size threshold of 1 kg.

**TABLE 3** Support for trophic-rate differences in the three-partition model

| Model comparison            | Posterior probability |        |               |        |
|-----------------------------|-----------------------|--------|---------------|--------|
|                             | AUTOsoft tree         |        | AUTOhard tree |        |
|                             | t.800                 | t.1000 | t.800         | t.1000 |
| Anthropoidea < background   | 0.791                 | 0.861  | 0.787         | 0.838  |
| Lorisiformes > background   | 0.939                 | 0.951  | 0.933         | 0.950  |
| Lorisiformes > Anthropoidea | 0.986                 | 0.995  | 0.984         | 0.991  |

Notation: AUTOsoft = autocorrelated rates of molecular evolution and soft-bounded constraints; AUTOhard = autocorrelated rates of molecular evolution and hard-bounded constraints; t.800 = size threshold of 800 g; t.1000 = size threshold of 1 kg.

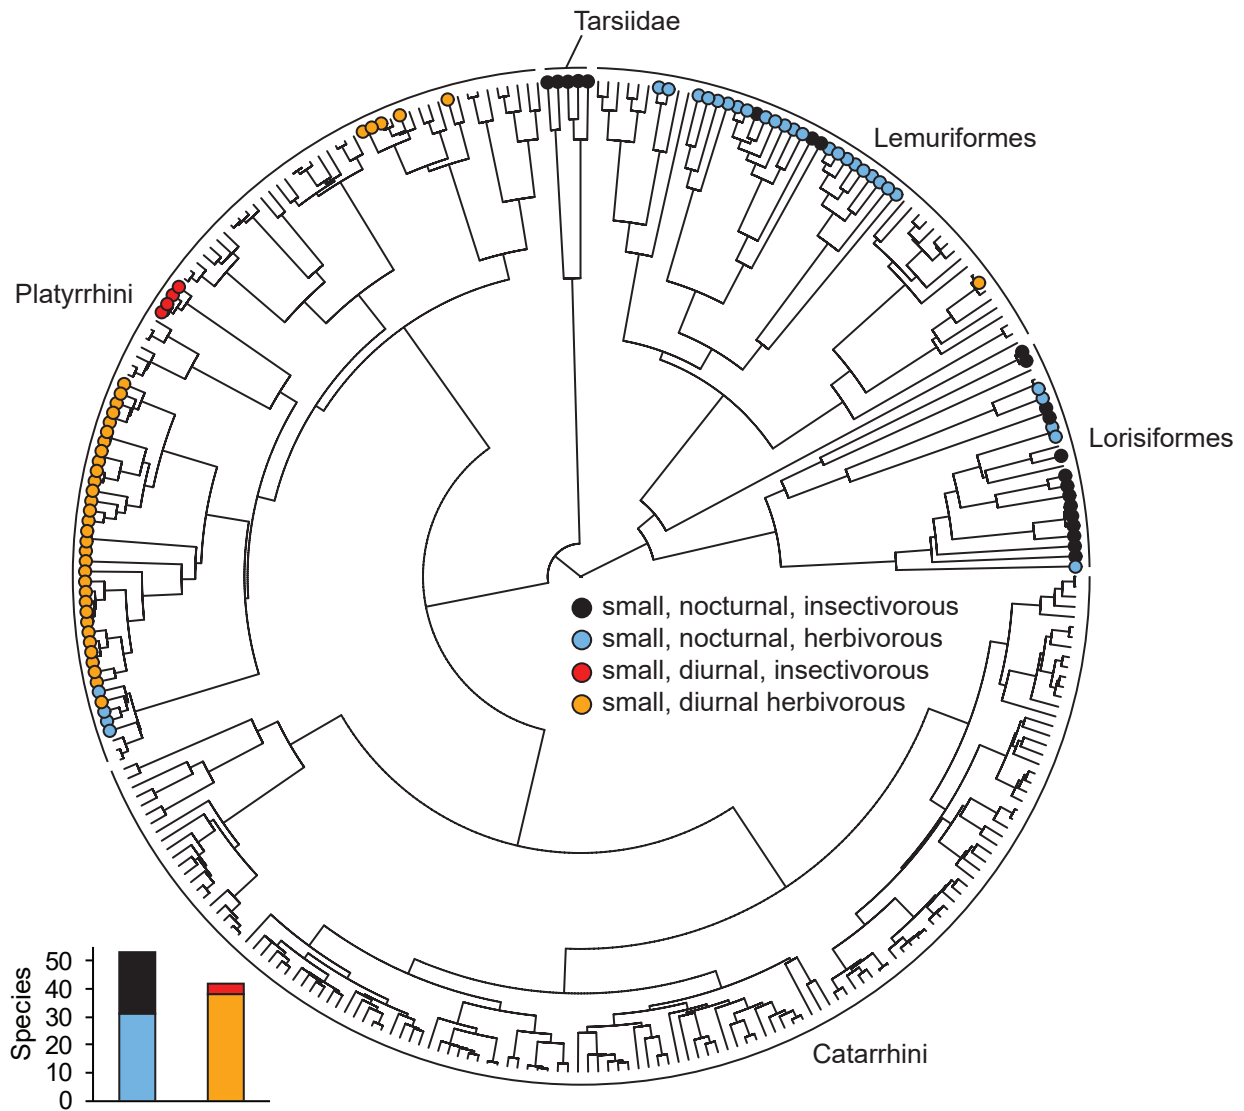

**FIGURE 1.** Primate phylogenetic tree from Springer et al. (2012) showing the distribution of trophic states by activity pattern among small-bodied species (<1 kg) at the tips (Scott, 2019). Cathemeral species are grouped with diurnal species. Large-bodied species, which are uniformly herbivorous and mostly diurnal, are not labeled. The relative frequency of insectivorous species is much greater among nocturnal lineages (41.5%) than among diurnal lineages (9.5%).

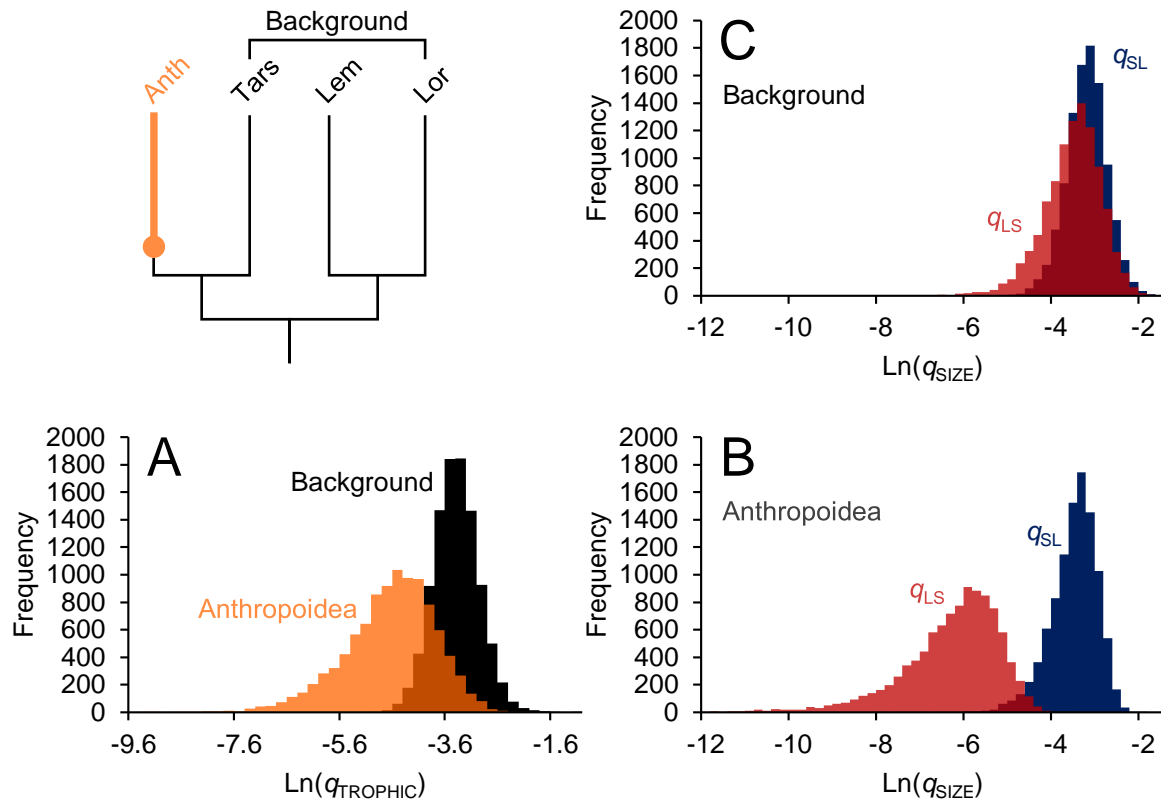

**FIGURE 2.** Posterior distributions of trophic transition rates (A) and size transition rates (B, C) for the model with Anthropoidea split from the rest of the tree and a size threshold of 800 g. The results shown here were generated using the timetree that assumed autocorrelated rates and soft-bounded constraints. Anth = Anthropoidea, Tars = Tarsiiformes, Lem = Lemuriformes, Lor = Lorisiformes,  $q$  = transition rate, SL = small to large, LS = large to small.

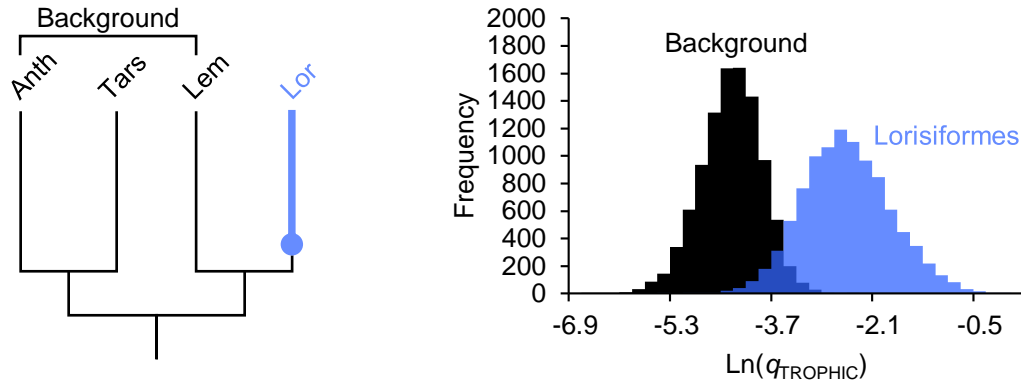

**FIGURE 3.** Posterior distributions of trophic transition rates for the model with Lorisiformes split from the rest of the tree and a size threshold of 800 g. The results shown here were generated using the timetree that assumed autocorrelated rates and soft-bounded constraints. Anth = Anthrozoidea, Tars = Tarsiiformes, Lem = Lemuriformes, Lor = Lorisiformes,  $q$  = transition rate.

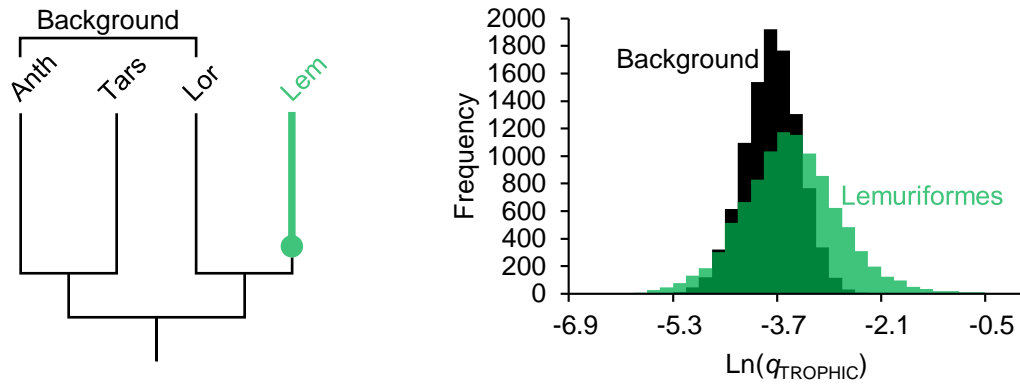

**FIGURE 4.** Posterior distributions of trophic transition rates for the model with Lemuriformes split from the rest of the tree and a size threshold of 800 g. The results shown here were generated using the timetree that assumed autocorrelated rates and soft-bounded constraints. Anth = Anthroidea, Tars = Tarsiiformes, Lem = Lemuriformes, Lor = Lorisiformes,  $q$  = transition rate.

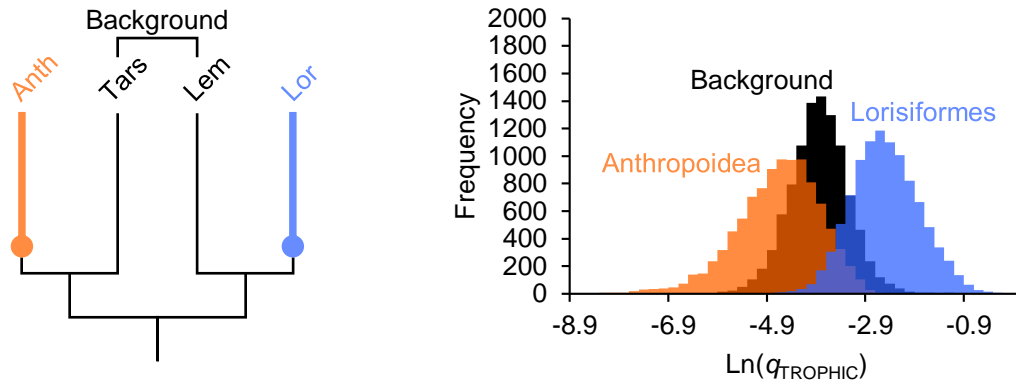

**FIGURE 5.** Posterior distributions of trophic transition rates for the model with Anthropoidea and Lorisiformes each split from the rest of the tree and a size threshold of 800 g. The results shown here were generated using the timetree that assumed autocorrelated rates and soft-bounded constraints. Anth = Anthropoidea, Tars = Tarsiiformes, Lem = Lemuriformes, Lor = Lorisiformes,  $q$  = transition rate.

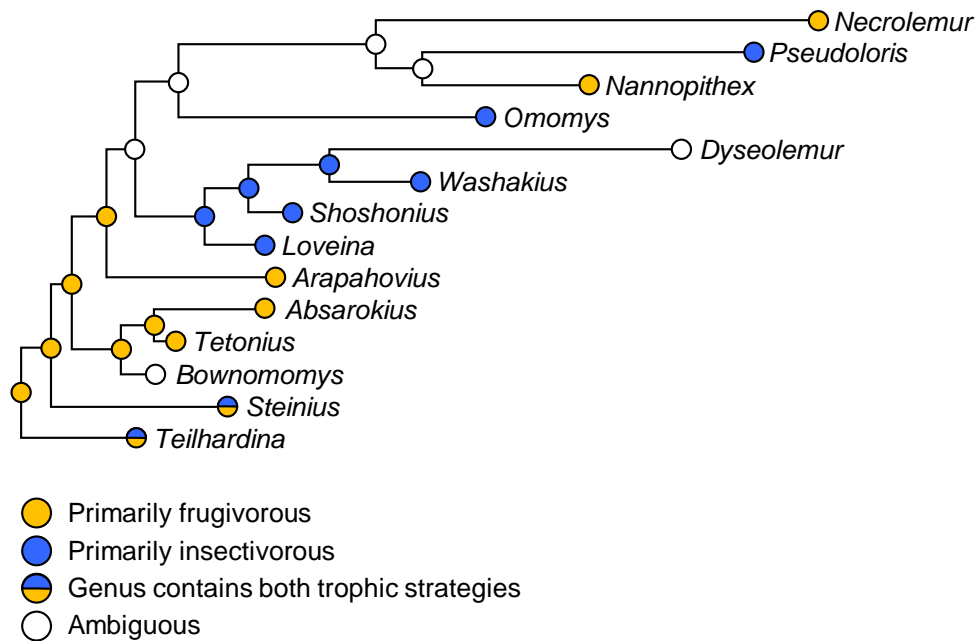

**FIGURE 6.** Phylogenetic distribution of trophic strategies among early and middle Eocene omomyiform genera. Dietary reconstructions for each genus are based mainly on the work of Strait (2001), with additional information from Ni, Wang, Hu, & Li (2004) and Williams & Covert (1994). Parsimony reconstructions of diet, obtained using Mesquite (v. 3.61; Maddison & Maddison, 2019), indicate a minimum of 5–7 shifts between trophic states, depending on how ambiguous taxa are coded. The reconstructions shown here are based on the data set where *Bownomomys* and *Dyseolemur* were coded as ambiguous (see Strait, 2001). The tree was taken from the Bayesian tip-dating phylogenetic analysis conducted by Seiffert et al. (2018; see their figure 17). Branch lengths are proportional to time; the tree spans approximately 20 million years from root to most recent tip (*Necrolemur*). *Teilhardina* includes *T. asiatica* and *T. belgica*; *Steinius* includes *S. vespertinus* and *S. annectens*; the use of *Bownomomys* here follows Morse et al. (2019) and is equivalent to *Teilhardina americana* in previous studies. See Strait (2001) and Seiffert et al. (2018) for the complete lists of species-level taxa.
